# Supplementary material
Source: PubMed Central journal article supplement (PMC10636755)

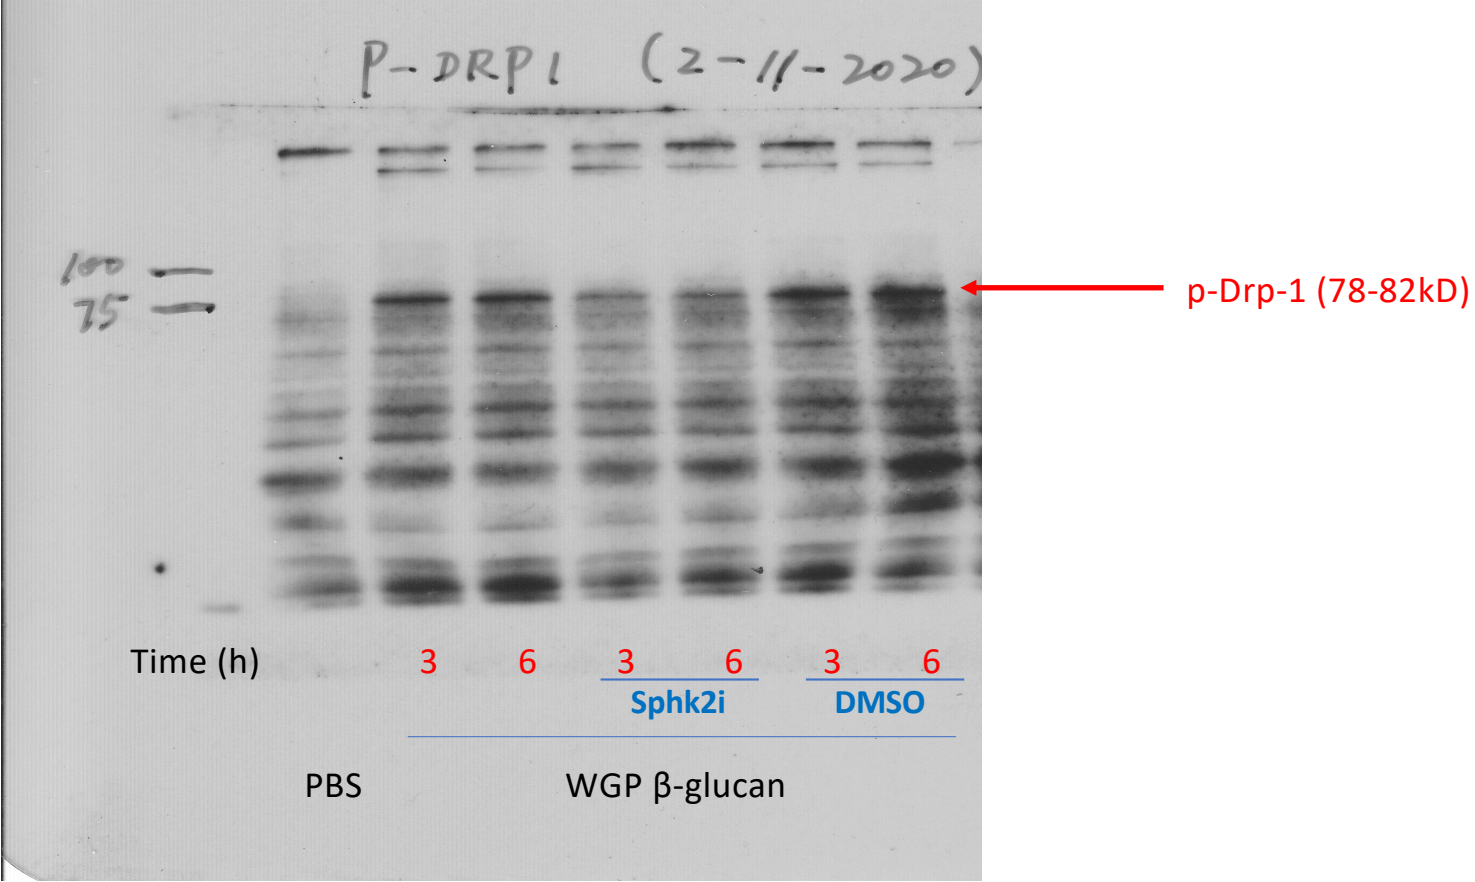

DRP-1 (2-12-2020)

100—  
75—  
50—

Drp-1 (78-82kD)

Time (h)

3

6

3

6

3

6

Sphk2i

DMSO

-2X

PBS

WGP  $\beta$ -glucan

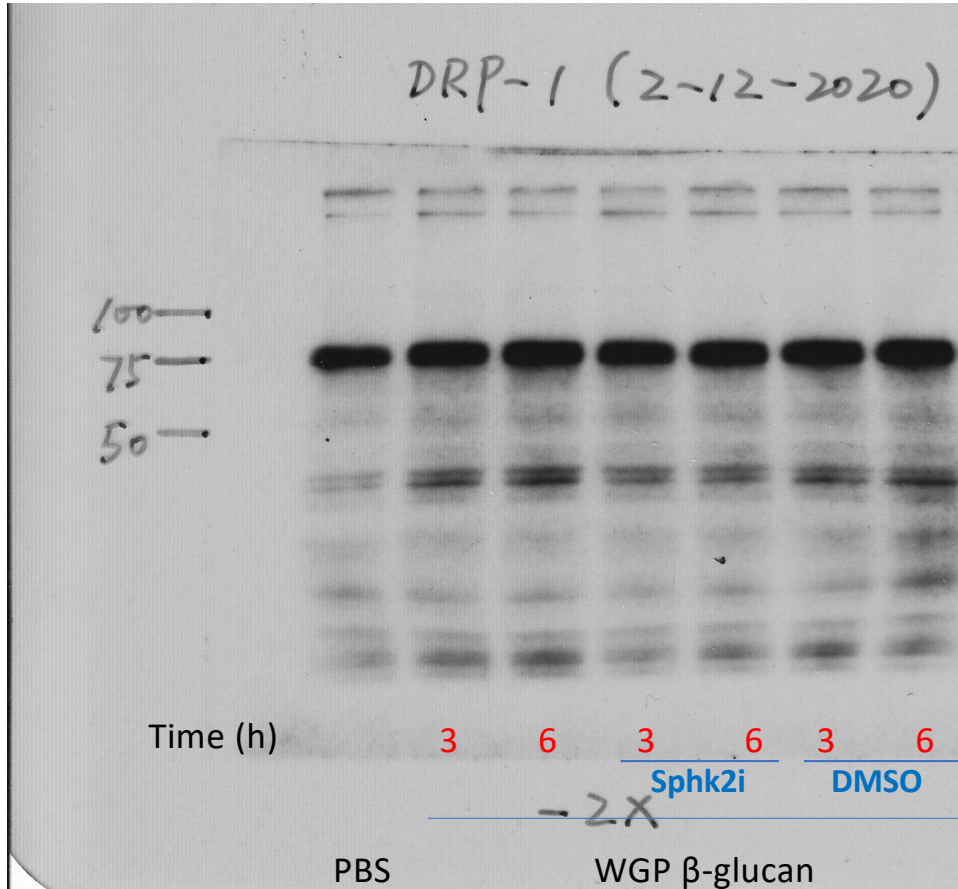

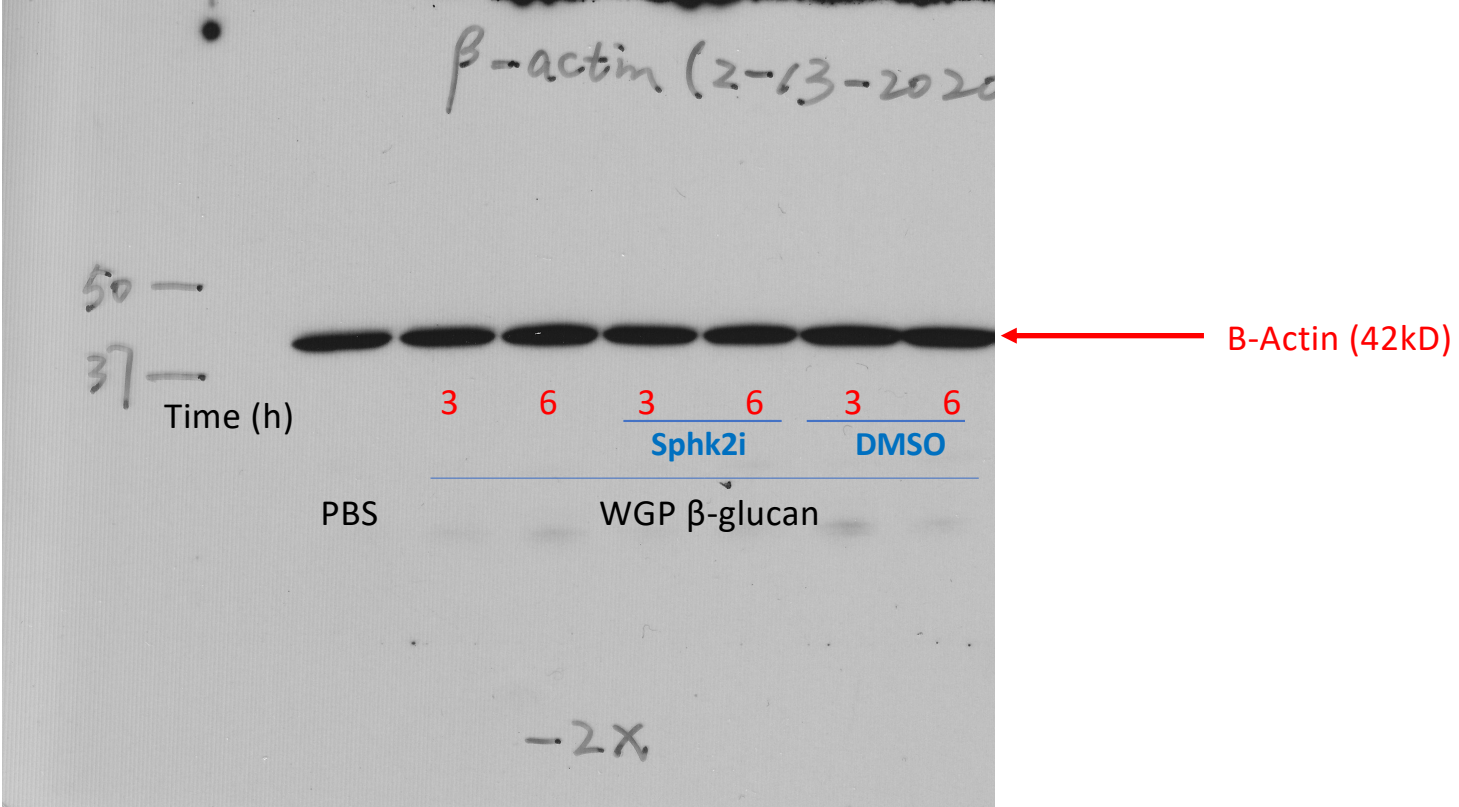

Supplement: NIHMS1942357-supplement-Figure_7_Blots.pdf [file NIHMS1942357-supplement-Figure_7_Blots.pdf]
